# Supplementary material for: Towards a Rigorous Network of Protein-Protein Interactions of the Model Sulfate Reducer Desulfovibrio vulgaris Hildenborough
Source: PubMed Central journal article supplement (PMC3125180; doi:10.1371/journal.pone.0021470), 2011-06-28
Supplement: pone.0021470.s004.pdf [file pone.0021470.s004.pdf]

**Figure S4. CLUSTAL 2.0.8 multiple sequence alignment of Ribosomal protein L7/L12**

```

RplL_Dv      MSITKEQVVEFIGNMTVLELSEFIKELEEKFGVSAAAPMAAMAVAAPAGDAAPAEKTE 60
RplL_Ec      MSITKDQIIIEAVAAMSVMDVVVELISAMEEKFGVSAAA-----AVAVAAG-PVEAAEKTE 54
            *****:***: * :*:***: *:* . :*****
            *****:***: * :*:***: *:* . :*****

RplL_Dv      FDIILKSAGANKIGVIKVVVRLTGLGLKEAKDKVDGAPSTLKEAASKEEAEAKQLVEA 120
RplL_Ec      FDVILKAAGANKVAVIKAVRGATGLGLKEAKDLVESAPAALKEGVSKDDAEALKALEEA 114
            **:*:***:*****:.***.***.* *****
            **:*:***:*****:.***.***.* *****

RplL_Dv      GAEVEIK 127
RplL_Ec      GAEVEVK 121
            *****:*
  
```

Note: Boxed region shows conserved lysine that has been observed to be methylated in RplL from *E. coli* K12 (Arnold and Reilly, 2002) as well as *D. vulgaris* JW801.
