# Supplementary material for: Towards a Rigorous Network of Protein-Protein Interactions of the Model Sulfate Reducer Desulfovibrio vulgaris Hildenborough
Source: PubMed Central journal article supplement (PMC3125180; doi:10.1371/journal.pone.0021470), 2011-06-28
Supplement: pone.0021470.s005.pdf [file pone.0021470.s005.pdf]

## Figure S5: Multiple Sequence Alignment of ApsA (DVU0847), ApsB (DVU0846), DsrC (DVU2776) and RplL (DVU2927):

### S. FIG 5A: CLUSTAL 2.0.8 multiple sequence alignment: ApsA (DVU0847)

```

DvDP4      MPMPVKEQPKG--VAIAEPTVKEHDVLLIVGGMGACGTAFAEAVRWADKY----APEL 54
DvH        MPMPVKEQPKG--VAIAEPTVKEHDVLLIVGGMGACGTAFAEAVRWADKY----APEL 54
DdG20      --MIPVKEQVKG--VAIAEPTIKEHDVDILLVGGMGACGTAFAEAVRWADKY----APEL 52
DpLSv54    -LNMALPNKPKGEILAVVDPEIVEHDI DVLIVGGGMAACGTAFEIKKWAP-----ADL 52
Td         -----MAG---EFGNPEVVQEDVDVLLIGGGMACCGAGYEIMRWADA AKAELGMDL 48
CcCaD3     -----MG-EKNEFKYCKKPEVVHVDTDILLIGGGMACCGAAYEAAKWATPK-----GL 47
PpBU-1     -----MGVEKNEFKFKCKPEVVYIDTDILLIGGGMACCGAVYEAAKWATPK-----GL 48
CtTLS      -----MGVEKNEFKFSQKPEVVYVDTDILLIGGGMACCGAAYEAAKWATPK-----GL 48
DaMP104C   -----MPNFETVEVTTDLLIVGGGMAACGAAVEAAHWAKKH-----GL 38
DrMI-1     -----MPNFETVVVNTDILILGGGMAACGAAVEAAYWAKKQ-----GL 38
SfMPOB     -----MPNFETVVVETDLLIIIGGMSACGAAFEAAWAKKH-----GL 38
           .                *:::****. .**:*  *  **
           .                *:::****. .**:*  *  **

DvDP4      KILLIDKASLERSGAVAQGLSAIN TYLG----KNDADDYVRMVRTDLMGLVREDLIFDLG 110
DvH        KILLIDKASLERSGAVAQGLSAIN TYLG----KNDADDYVRMVRTDLMGLVREDLIFDLG 110
DdG20      KILLIDKAALERSGAVAQGLSAIN TYLG----DNSADDYVRMVRTDLMGLVREDLIFDLG 108
DpLSv54    KIMLVDKAALERSGAVAQGLSAIN TYIG----ENKIEDYVKMVRNDLMGVVREDLIYDCG 108
Td         KIKLVDKAAMDRSGAVAQGLSAIN TYIGS---EQDPADYARMVSN DLMGITRDDLAYDLG 105
CcCaD3     KITMVDKASVDRSGAVAQGLSAIN TYCG----ENDPADYVKYVRTDLMGI IREDLVYDLG 103
PpBU-1     RITMVDKASVDRSGAVAQGLSAIN TYCG----ENDPADYVKYVRTDLMGI IREDLVYDLG 104
CtTLS      RITMVDKAAVDRSGAVAMGLSAIN TYCG----ENDPADYVKYVRADLMGI IREDLVYDLG 104
DaMP104C   KVTLVDKAAMDRSGAVAQGLSAIN LYVGLRDNENTVMDYVEYVRNDLMGI ARDDL VYNIA 98
DrMI-1     KITLVDKAAMDRSGAVAMGLSAIN QYLGIAKGENTVEDYVKYVKNDLMGI ARDDQVADIA 98
SfMPOB     KVTVVDKAAMDRSGAVAMGLSAIN QYIGYAKGENTLEDYVKYVRQDLMGIS REDLVYNIA 98
           :: ::****:::***** ***** * *  .:  **.. *  ****: *: *  : .

DvDP4      RHVDDSVHLFEEWGLPCWIKDEHGHNLDGAQAKAAGKSLRNGDDPVRSGRWQIMINGESY 170
DvH        RHVDDSVHLFEEWGLPCWIKDEHGHNLDGAQAKAAGKSLRNGDDPVRSGRWQIMINGESY 170
DdG20      RHVDDSVHLFEEWGLPCWIKDENHGHNLDGAAAKAAGKSLRNGDAPVRSGRWQMMINGESY 168
DpLSv54    RHVDESVKLFEEWGLPVWKKDAAGDNLDGSKPAAS---LREGGTPVRTGKWQIMINGESY 165
Td         RNVDDSVHLFEEWGLPIWKTDENGERHDGAQGLPA---LKDGGKPVRSKGWQIMINGESY 162

```

CcCaD3 RHVDDSVHLFEEWGLPVWKRDEGDGSSMDGSKPAPK---LTEGGKPVRSGRWQIMINGESY 160  
PpBU-1 RHVDNSVHLFEEWGLPVWKRDEGDGSTQDGAKPAPK---LSEGGKPVRSGRWQIMINGESY 161  
CtTLS RHVDNSVHLFEEWGLPIWKRDEGDGSTM DGAKPAPK---LTEGGKPVRSGRWQIMINGESY 161  
DaMP104C RHV DSTVHLFEKWGLPIWPKGEDDPFRI-----GPYQRGGRWQVMINGESY 144  
DrMI-1 RHV DSSVHLFEKWGLPIWTNDE-----GNYVRGGRWQIMLNGESY 138  
SfMPOB RHV DSSVHLFEKWGLPIWKDAD-----GKYVHEGRWQIMINGESY 138  
\* : \*\* . : \* : \*\* : \*\* \* \* \* \* \* \* \* : \* : \*\* : \* : \*\* \* \* \* \* \*

DvDP4 KCIVAEAAKNALGEAR-----IMERIFIVKLLLDANTPNRVAGAVGFNLRANEVHIF 222  
DvH KCIVAEAAKNALGEAR-----IMERIFIVKLLLDANTPNRVAGAVGFNLRANEVHIF 222  
DdG20 KNIVAEAAKNALGEDR-----IMERIFIVKLLLDANEENRIAGAVGFSLRENVVHIF 220  
DpLSv54 KPIVAEPAATALGADN-----ILERVFIVKLLLDKNKPNQIAGAAGFSTRDNTVHIF 217  
Td KWIVAEATKKALGMDR-----IEERIFIVKLVNDKNDPSRIAGAVGFSTRDHKVVVY 214  
CcCaD3 KVIVAEAAKKALEYNRKATGVDQNLFERVFI SELIFDKNDPSKVAGAIGFSVREHKAYVF 220  
PpBU-1 KVIVAEAAKKALEYNRKATGVDQNLFERVFI SELIHDKNDPNRIAGAIGFSVRENKAYVF 221  
CtTLS KVIVAEAAKKALEYNRKETGVEQNL YERVFI SELIHDKNNPSKVAGAIGFSVREHKAYVF 221  
DaMP104C KIIIVAEAAKNALG-----KDNIYERVFIVEPIVENN---RIAGAVGF SVREEKFYVF 193  
DrMI-1 KIIIVAEAAKNALG-----TDNIYERVYICEPIMDGD---RIAGAIGFSTREEKVYVF 187  
SfMPOB KVLVAEAAKNAMATLGD----KGELLERVFIVEPLMDGD---KCVGGVGF SVRENKFYVI 191  
\* : \*\* \* . : \* : \* : \* : \* : \* : \* : \* : \* : \* : \* : \* : \* : \* : \* : \* : \* : \* : \* : \*

DvDP4 RSNAMLVACGGAVNVYKPRSTGEGMGRAWYPVWNAGSTYTMCAQVGAEMTMMENRFV PAR 282  
DvH RSNAMLVACGGAVNVYKPRSTGEGMGRAWYPVWNAGSTYTMCAQVGAEMTMMENRFV PAR 282  
DdG20 RTNAMLVACGGAVNVYKPRSTGEGMGRAWYPVWNAGSTYTMCAQVGAEMTMMENRFV PAR 280  
DpLSv54 RCKAAMVACGGAVNIFRPRSTGEGKGRAWYPVWNAGSTYTMCAQVGATLTMIENRFT PAR 277  
Td KAKAILLAAGGCVNIFRPRSVGEGTGRAWYPVWNAGSTYAMAAEAGAELTMMENRFV PAR 274  
CcCaD3 TAKTMLLACGGAVNIYRPRSTAEGQGRAWYPIWNAGTTYALAAQAGCELVL MENRFV PAR 280  
PpBU-1 TAKTMLLACGGAVNVYRPRSTAEGQGRAWYPVWNAGTTYALAAQAGCELVL MENRFV PAR 281  
CtTLS TAKTMLLACGGAVNVYRPRSTAEGQGRAWYPVWNAGTTYALAAQAGCELVL MENRFV PAR 281  
DaMP104C RAKAVLCAMGGCVGVFRPRSSGEGLSWYPPFSTGSSAYFTIKAGAEMTCQEVRFIPVR 253  
DrMI-1 KAKAVLASMGGAVGVFKPRSTGEGLSWYPPFSSGSSAYFTMVAGAEMTCQEVRFIPVR 247  
SfMPOB KAKATIAAMGGAVHVFPRPSVGEGLGRAWYPPWNAGSTAYFTIRAGAEMTCQEVRFIPVR 251  
: : : : \* \* . \* : : : \* \* \* \* \* \* \* \* \* \* \* \* \* : : \* \* . : . \* \* \* \* \* \*



DaMP104C AACNINPEEKES EIAAAEPYFIGSHSGASGAWVSGPDD-----VAPPEY--FWG 415  
DrMI-1 AASNIAPEEKHSEIAAAEPYFIGSHSGASGAWVSGPAD-----IAPA EY--QWG 409  
SfMPOB AGSNIQPEEKPSEIAAAEPYFIGSHSGASGAWVCGPED-----VMPAEYKKQWE 415

. \*\* \*:: \*\* : .:\*\*\*::\*\*\*:\*..\* \*..\*\* :

DvDP4 ---IYNRMTTVEGLWTCADGVGASGHKFSSGSHAEGRICGQMVRWCLDHKDYKPAIKES 503  
DvH ---IYNRMTTVEGLWTCADGVGASGHKFSSGSHAEGRICGQMVRWCLDHKDYKPAIKES 503  
DdG20 ---VYNRMTTVEGLWTCADGVGASGHKFSSGSHAEGRICGQMVRWCIDHKDYKPAIAEK 501  
DpLSv54 W--GYNRMTTVDGLFTAGDVGASGHKFSSGSHAEGRIA AKQMVKFCRDN-DFTPELMQT 508  
Td WNWGYRSMTTVKGLFTAGDVGASGHKFSSGSHAEGRMCAKSMVKYCIDNKDWKPELDTP 503  
CcCaD3 ----YNRMTTVEGLFTAGDVGASGHKFSSGSHAEGRIAGKAMTAYCLDHADYKPTLGRD 496  
PpBU-1 ----YNRMTTVDGLFTAGDVGASGHKFSSGSHAEGRIAGKNMTAYCLDHVDYKPELGRD 497  
CtTLS ----YNRMTTVDGLFTAGDVGASGHKFSSGSHAEGRIAGKSMTAYCLDHADYKPELGRD 497  
DaMP104C ----YPNLT TVDGLFAAGDASGASSHKFSSGSHAEGRIAGKAACKYLVDKNPDLPNV DPA 471  
DrMI-1 ----YT NM TTVKGLFAAGDASGASSHKFSSGSHAEGRIAGKSMVRFVVENN-QEPNIDDA 464  
SfMPOB PIGVYANMTTVKALFTCGDGSASSHKFSSGSHAEGRVA AKGAIAYILDNN-VAPKVDDA 474

\* :\*\*\*..\*::..\* .\*\*\*.\*\*\*\*\*:..\* : :: \* :

DvDP4 -ADELVKLIYRPYYNYMEGKAASTDPVVNPSYITPKNFMMRLVKCTDEYGGGVGTYYTTS 562  
DvH -ADELVKLIYRPYYNYMEGKAASTDPVVNPSYITPKNFMMRLVKCTDEYGGGVGTYYTTS 562  
DdG20 -GEDLAKLIYRPYYNYLAGKDASTDPVVNPEYITPKNFMMRLVKCTDEYGGGVGTYYTTS 560  
DpLSv54 -PQEI ADEIYAPVRLYNEHVGASTAADVNPNYCKPAGLMMRLMKATDEYGGGVATYYMTS 567  
Td -VEQLVEEIIYKPVRTFLEHKDYTTAIDVNP NYITPKMLQFRLQKIMDEYVAGVATYYKTN 562  
CcCaD3 -VDEVLGEIYAPMETFGKYKDYSTDPNVNPNYIRPKMFQARLQKIMDEYVAGVATWYTTS 555  
PpBU-1 -VEEVIAEIIYAPMEIFGKNKDYSTDPNVNPNYIRPKMFQARLQKIMDEYVAGVATWYTTS 556  
CtTLS -VDEVIAEIIYAPMETFAKYKDYSTDPSVNP NYIRPKMFQARLQKIMDEYVAGVSTWYTTS 556  
DaMP104C VVEALKAKILAPLDRFQEFKDFTTAPEVNP NYILPKQYKHRIQKLMDEYAGGWGSNFTTS 531  
DrMI-1 KVEELKAKILKPLAVWEEFAGFTTDPETNP NYILPKMYMFRLQKMMDEYAGGVVANFTTS 524  
SfMPOB KVEALKKIILAPMDRFE EFAKLSSDPDINPNFIKPKMFMFRLQKIMDEYCAGVSSQFTTN 534

: : \* \* : :: \*\*.: \* \* : \* \*\*\* .\* : : \* .

DvDP4 AAALDTGFSLLGMLEEDSLKLAARDLHELLRCWENYHRLWTVRLHMQHIRFREESRYPGF 622  
DvH AAALDTGFSLLGMLEEDSLKLAARDLHELLRCWENYHRLWTVRLHMQHIRFREESRYPGF 622  
DdG20 QAALDTGFHLLDMLEEDSLKLAARDLHELLRCWENYHRLWTVRLHMQHIAFREESRYPGF 620  
DpLSv54 GKLLNICLDLLLLLREDADKMAAGDLHELLRCWENYHRIWCVETHIRHIEFRKESRYPGF 627  
Td ANMLVAEDKLGMLKEDA EKMRADLHELLRAWENYHRILTAEAHMKHIQFREESRYPGF 622  
CcCaD3 KTMLDKGLEHLSLLKEDA EKMAAEDVHELMRCWENYHRVIAGEAHARHILFREDSRYPGY 615  
PpBU-1 KTMLEKGLEHLSLLKEDASKMAAEDNHELMRCWENYHRLMAGEAHARHILFREDSRYPGY 616

```

CtTLS      KTMLEKGLEHLSLLKEDAEMAAADLHELMRAWENYHRLMAGEAHARHILFREDSRYPGY 616
DaMP104C  KMLLEKGMAYLQMLKEDSEKLAARDLNELMRCWENIHRTWVAESHIRTILFREETRWPGY 591
DrMI-1    KTLLEVGLELLTMLKEDSQKLAARDLHELMRAWENIHRTLQAESHIRTVLFREETRFPGY 584
SfMPOB    KSLLTRGLELLTMLKEDSEKLAASDLHELLRAWENTHRLWIAESHLRHVMFREESRWPGY 594
          *      *      :*.** : * : * * :**:*.**** **      . * : : **::**:**:

DvDP4     YYRADFMGLDDSKWKCFVNSKYDPATGETKIFKKAYYQIIP E----- 664
DvH       YYRADFMGLDDSKWKCFVNSKYDPATGETKIFKKAYYQIIP E----- 664
DdG20     YYRADFMGLDDSKWKCFVNSRYDVKAGTTKVFKKPYQIVPA----- 662
DpLSv54   YYRSDFPNVDDENWKC FVNSTFNPETKEWLCEKVECLNI IETEPWL----- 673
Td        YYRMDKNFVDDENWHCFVNSVYDKNSKQWNCFKRAHVLDVDSKLFKPAAH 673
CcCaD3    YFRADHFYVDDENWKCFTISKYDRESKNWTL SKRDYVQIIPD----- 657
PpBU-1    YFRADHFYVDDENWKCFTISKYDRSTQNWTL SKRDYVQVIPD----- 658
CtTLS     YFRADHFYVDDENWKCFTISKYDRDSKEWTL SKRDYVQVVPD----- 658
DaMP104C  YFRADFPNMDDN-WEVFNCKWDPNTGEWEVFKRDIIRL----- 629
DrMI-1    YFRADLPKMDPD-WEVFCNKYDAANGEWEMIKRPIIRLVD----- 624
SfMPOB    YYRADFPDMDEANWKC FVNSVYNPATGEWTMKKVPVNVIV----- 634
          *:* *      :*      *. *      . : :      *      :

```

Note: Boxed region indicates position of lysine residue that was found to be methylated in ApsA (DVU0847). Homologs from the following organisms were used for this alignment: *Desulfovibrio vulgaris* DP4 (DvDP4), *Desulfovibrio vulgaris* Hildenborough (DvH), *Desulfovibrio desulfuricans* G20 (DdG20), *Desulfotalea psychrophila* LSv54 (DpLSv54), *Thiobacillus denitrificans* (Td), *Chlorobium chlorochromatii* CaD3 (CcCaD3), *Pelodictyon phaeoclathratiforme* BU-1 (PpBU-1), *Chlorobium tepidum* TLS (CtTLS), *Desulfurudis audaxviator* MP104C (DaMP104C), *Desulfotomaculum reducens* MI-1 (DrMI-1) and *Syntrophobacter fumaroxidans* MPOB (SfMPOB)



```

SfMPOB      LAGFATGTDD-IKSPVLCTEPASTWASELPTLKK----- 147
Af          FEGFPEPTEEALKSELLAGEPEIIGTSEFPQVKKKA----- 150
           * .      :      :

```

Note: Boxed region indicates position of lysine residue that was found to be methylated in ApsB (DVU0846). Homologs from the following organisms were used for this alignment: *Desulfovibrio vulgaris* DP4 (DvDP4), *Desulfovibrio vulgaris* Hildenborough (DvH), *Desulfovibrio desulfuricans* G20 (DdG20), *Desulfotalea psychrophila* Lsv54 (DpLsv54), *Chlorobium tepidum* TLS (CtTLS), *Chlorobium chlorochromatii* CaD3 (CcCaD3), *Chlorobium phaeobacteroides* BS1 (CpBS1), *Thiobacillus denitrificans* (Td), *Desulfotomaculum reducens* MI-1 (DrMI-1), *Syntrophobacter fumaroxidans* MPOB (SfMPOB) and *Archaeoglobus fulgidus* (Af).

**S. FIG 5C: CLUSTAL 2.0.8 multiple sequence alignment: DsrC (DVU2776)**

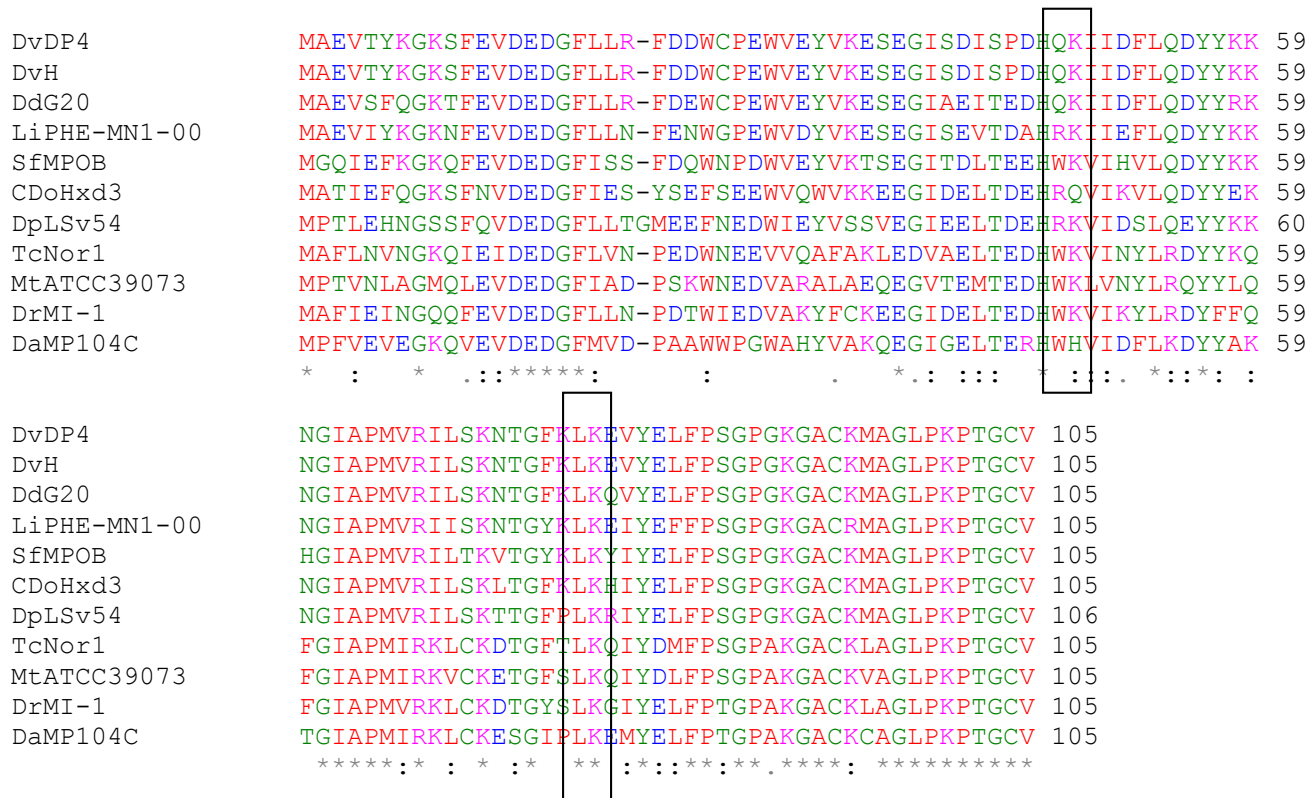

Note: Boxed regions indicate positions of lysine residues that were found to be methylated in DsrC (DVU2776). Homologs from the following organisms were used for this alignment: *Desulfovibrio vulgaris* DP4 (DvDP4), *Desulfovibrio vulgaris* Hildenborough (DvH), *Desulfovibrio desulfuricans* G20 (DdG20), *Lawsonia intracellularis* PHE/MN1-00 (LiPHE-MN1-00), *Syntrophobacter fumaroxidans* MPOB (SfMPOB), *Candidatus Desulfococcus oleovorans* Hxd3 (CDoHxd3), *Desulfotalea psychrophila* LSv54 (DpLSv54), *Thermosinus carboxydvorans* Nor1 (TcNor1), *Moorella thermoacetica* ATCC 39073 (MtATCC39073), *Desulfotomaculum reducens* MI-1 (DrMI-1), and *Desulfurudis audaxviator* MP104C (DaMP104C).



**S. FIG 5D: CLUSTAL 2.0.8 multiple sequence alignment: RplL (DVU2927)**

```

DvH      MS-ITKEQVVEFIGNMTVLELSEFIKLEEEKFGVSAAAPMAAMAVAAPAGDAAPAE-EEK 58
DvDP4    MS-ITKEQVVEFIGNMTVLELSEFIKLEEEKFGVSAAAPMAAMAVAAPAGDAAPAE-EEK 58
DdG20    MSDITKEQVVEFIAGMTVLELSEFIKLEEEKFGVSAAAPVAAMA-AAPAEAAAPAE-EEK 58
LiPHE-MN1-00 MS-VTKEQVIEFISNMTVLELSQFIKLEEEKFGVSAAAPAVGMMMAAPTAAASAEAEAEK 59
GmGS-15  MAEITKADVVSFIENMTVLELSELVKELEEKFGVSAAAPVAVAAAAAPAAAAEAAE--EK 58
GsPCA    MAEITKADVISFIENMTVLELAELVKELEDKFGVSAAAPVAVAAAAAPAAAAEAAE--EK 58
Gsp.FRC-32 MAEITKADVISFIEKMSVLELAEMVKELEEKFGVSAAAPVAVAAVAGP-AAAEAAE--EK 57
G1SZ     MAEITKADVAFIEKMTVLELAELVKELEEKFGVSAAAPVAVAA-AAPAAAAEAAE--EK 57
PpDSM2379 MAEITKQDVIEYIEKMSVLELSELVKELEEKFGVSAAAPVAVAAAGPATADAAAAE--EK 58
DaDSM684  MADITKEQVIEFIENMSVLELSELVKELEDKFGVSAAAPVAVAAAGPAGDAGAAAE--EK 58
Dspp.    MADITKEQVIEFIENMSVLELSELVKELEDKFGVSAAAPVAVAAAGPAGDAGAAAE--EK 58

```

```

*: :*: **: :* *:*:*:*:::***:***** . . . ** **

```

```

DvH      TEFDIILKSAGANKIGVIKVVRLTGLGLKEAKDKVDGAPSTLKEAASKEEAEAEAKKQLV 118
DvDP4    TEFDIILKSAGANKIGVIKVVRLTGLGLKEAKDKVDGAPSTLKEAASKEEAEAEAKKQLV 118
DdG20    TFDVILKSPGANKIAVIKVVRLTGLGLKEAKEKVDGTPSTLKEAVSKDDAEAAKQLK 118
LiPHE-MN1-00 TFDVILKEAGANKIAVIKVVRLTGLGLKEAKDKVDGAPSTLKEGVSKEDAEAEAKKQLT 119
GmGS-15  TEFDIILKSAGANKIGVIKVVRLTGLGLKEAKDLVDGAPKSVKTGVSKEEAEADAKKQLV 118
GsPCA    TFDVILKSAGANKIGVIKVVRLTGLGLKEAKDLVDGAPKPVKNGVSKEEAEAEAKKQLV 118
Gsp.FRC-32 TFDVILKAAGANKIGVIKVVRLTSLGLKEAKDLVDGAPQPLKTGVSKEEAEAEAKKQLV 117
G1SZ     TFDVILKSAGANKINVIKVVRLTSLGLKEAKDLVDGAPSPVKTGISKAEAEAEAKKQLV 117
PpDSM2379 TFDVILKAAGANKINVIKVVRLTSLGLKEAKDLVDGAPGAVKTGVSKEEAEAEAKKQLV 118
DaDSM684  TFDVVLGTGAGDKKINVIKVVRSVTGLGLKEAKEMVDGAPSTVKEAAAKEEAEDIKKQLE 118
Dspp.    TFDVVLGTGAGDKKINVIKVVRSVTGLGLKEAKEMVDGAPSTVKEAAAKEEAEDIKKQLE 118

```

```

****:.* . * :** *****:.* *****: ***:* .:* . :* :*: ***

```

```

DvH      EAGAEVEIK 127
DvDP4    EAGAEVEIK 127
DdG20    EAGAEVEVK 127
LiPHE-MN1-00 EAGATVEVK 128
GmGS-15  ESGAEVEIK 127
GsPCA    ESGAEVEIK 127
Gsp.FRC-32 EAGAEVEIK 126
G1SZ     EAGAEVEIK 126
PpDSM2379 EAGAEVEVK 127

```

DaDSM684           EAGASVELK 127  
D spp.               EAGASVELK 127  
\* : \* \* \* \* \* : \*

Note: Boxed regions indicate positions of lysine residues that were found to be methylated in RplL (DVU2927). Homologs from the following organisms were used for this alignment: *Desulfovibrio vulgaris* DP4 (DvDP4), *Desulfovibrio vulgaris* Hildenborough (DvH), *Desulfovibrio desulfuricans* G20 (DdG20), *Lawsonia intracellularis* PHE/MN1-00 (LiPHE-MN1-00), *Geobacter metallireducens* GS-15 (GmGS-15), *Geobacter sulfurreducens* PCA (GsPCA), *Geobacter* sp. FRC-32 (Gsp.FRC-32), *Geobacter lovleyi* SZ (GlSZ), *Pelobacter propionicus* (DSM 2379), *Desulfuromonas acetoxidans* DSM 684 (DaDSM684) and *Desulfuromonas* spp. (D spp.).
