# Supplementary material for: Towards a Rigorous Network of Protein-Protein Interactions of the Model Sulfate Reducer Desulfovibrio vulgaris Hildenborough
Source: PubMed Central journal article supplement (PMC3125180; doi:10.1371/journal.pone.0021470), 2011-06-28

**Figure S7: Q-Star MS/MS data for ApsA, ApsB, and DsrC post-translational modifications.**

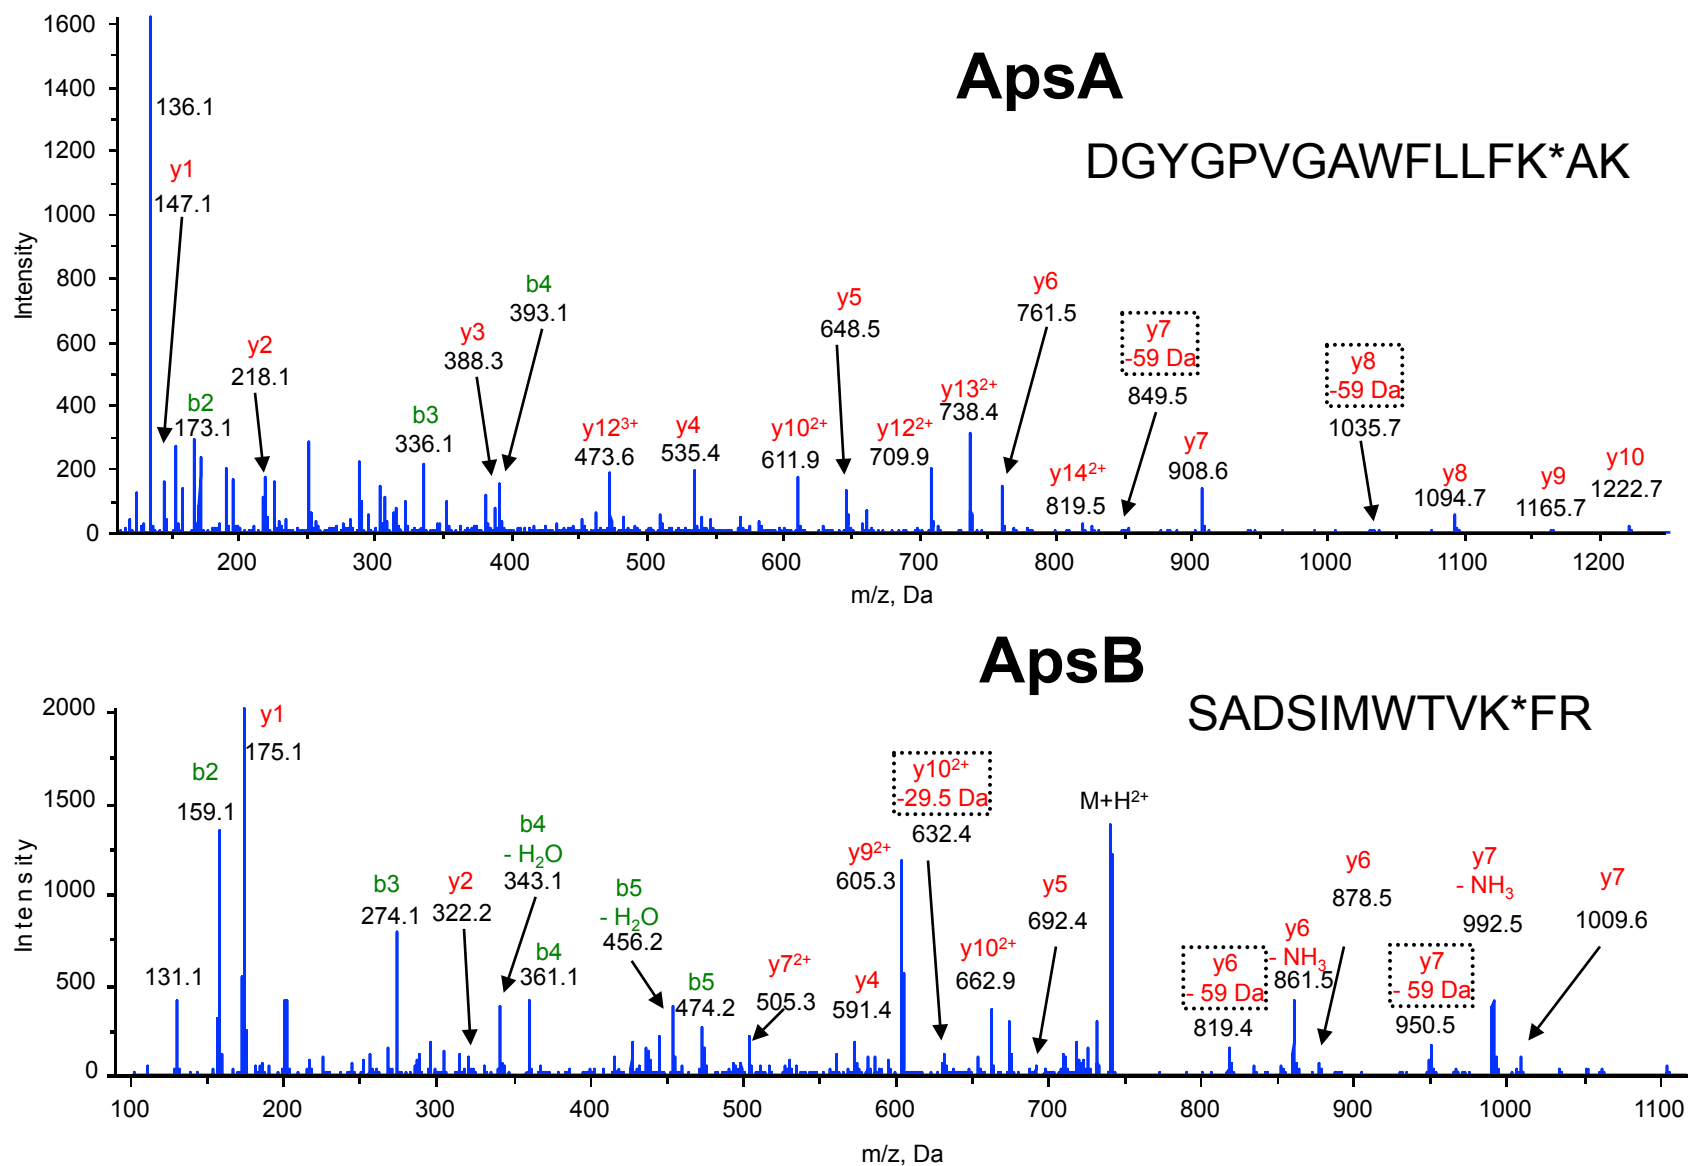

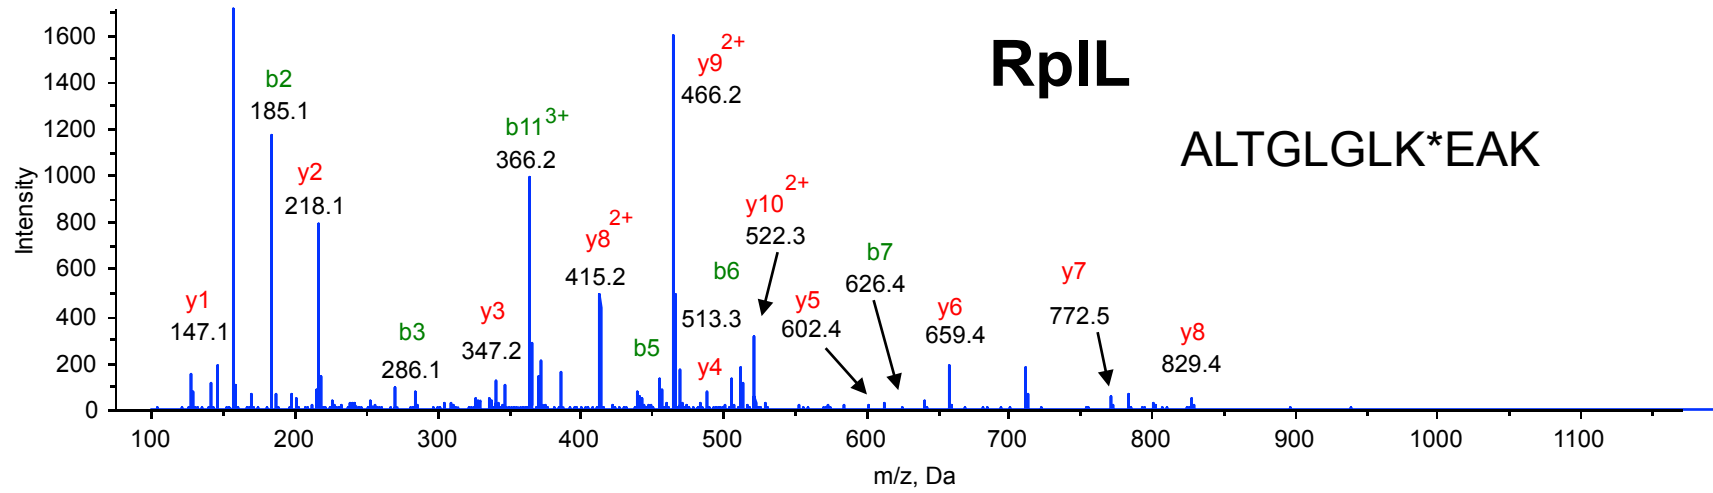

Supplement: pone.0021470.s007.pdf [file pone.0021470.s007.pdf]
