# Supplementary material for: Towards a Rigorous Network of Protein-Protein Interactions of the Model Sulfate Reducer Desulfovibrio vulgaris Hildenborough
Source: PubMed Central journal article supplement (PMC3125180; doi:10.1371/journal.pone.0021470), 2011-06-28

**Fig S8:** Replicate agreement for pull-down experiments.

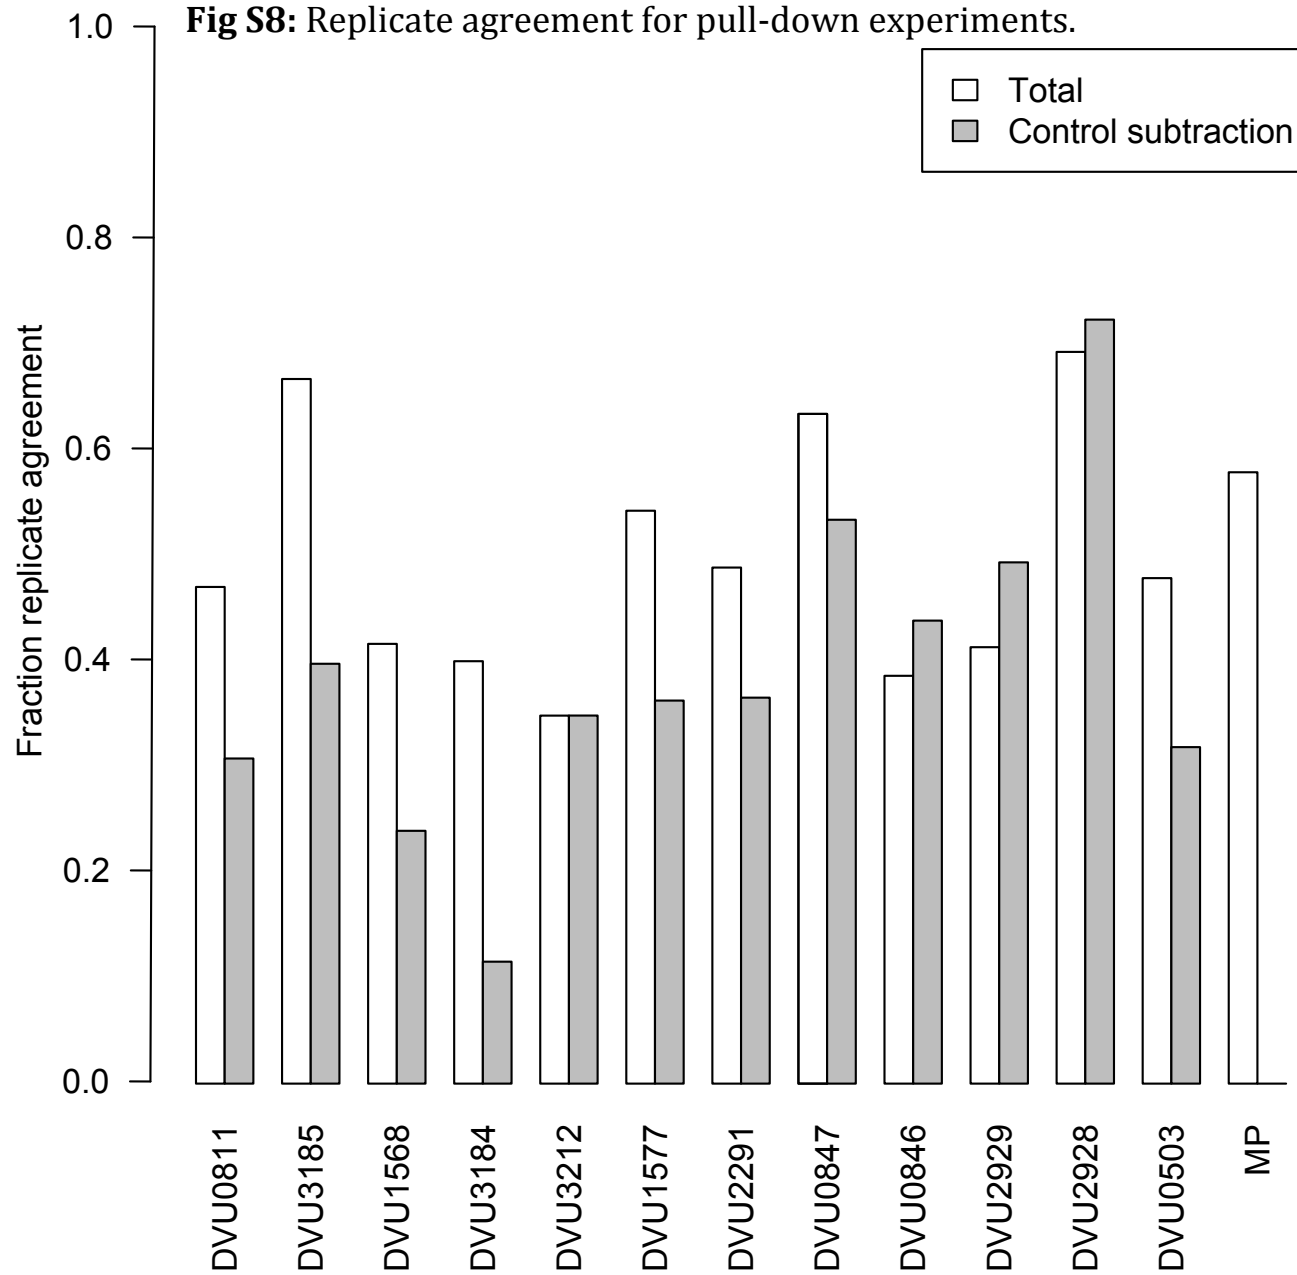

Supplement: pone.0021470.s008.pdf [file pone.0021470.s008.pdf]
