# Supplementary material for: Towards a Rigorous Network of Protein-Protein Interactions of the Model Sulfate Reducer Desulfovibrio vulgaris Hildenborough
Source: PubMed Central journal article supplement (PMC3125180; doi:10.1371/journal.pone.0021470), 2011-06-28

**Fig. S9. Cloning Schemes used for suicide vector construction**

**Scheme I**

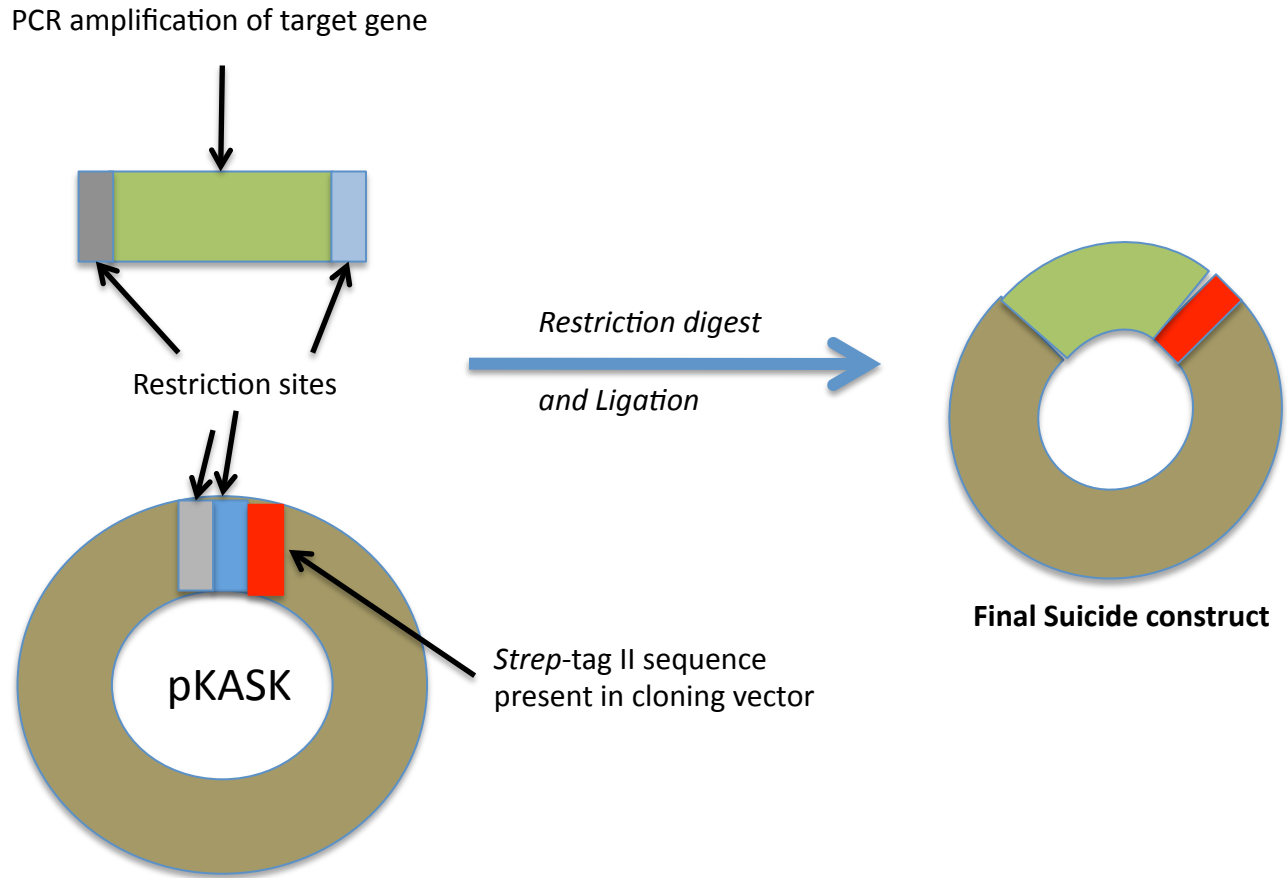

**Scheme II**

1. Orphan gene or last gene in operon (Green):

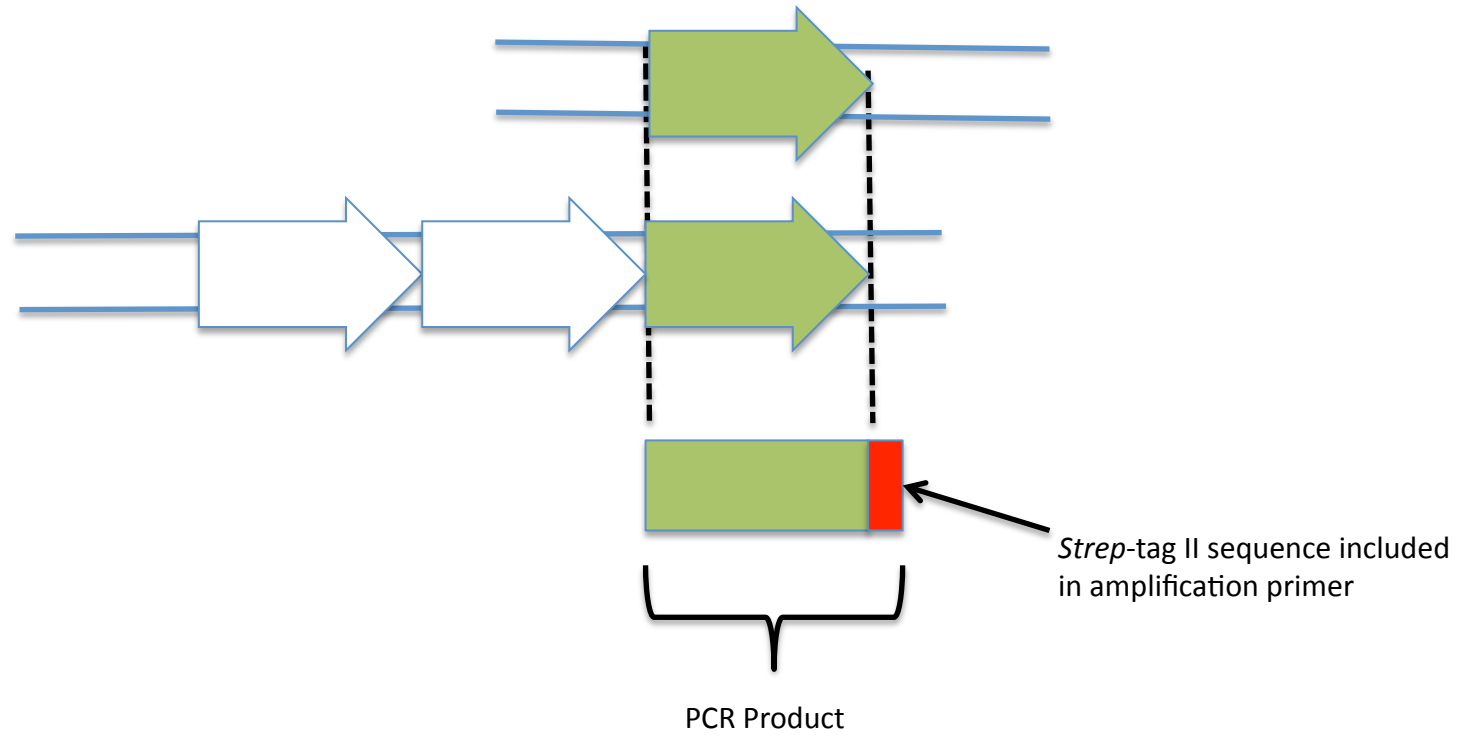

**Scheme II**

2. First or second gene in operon (Green):

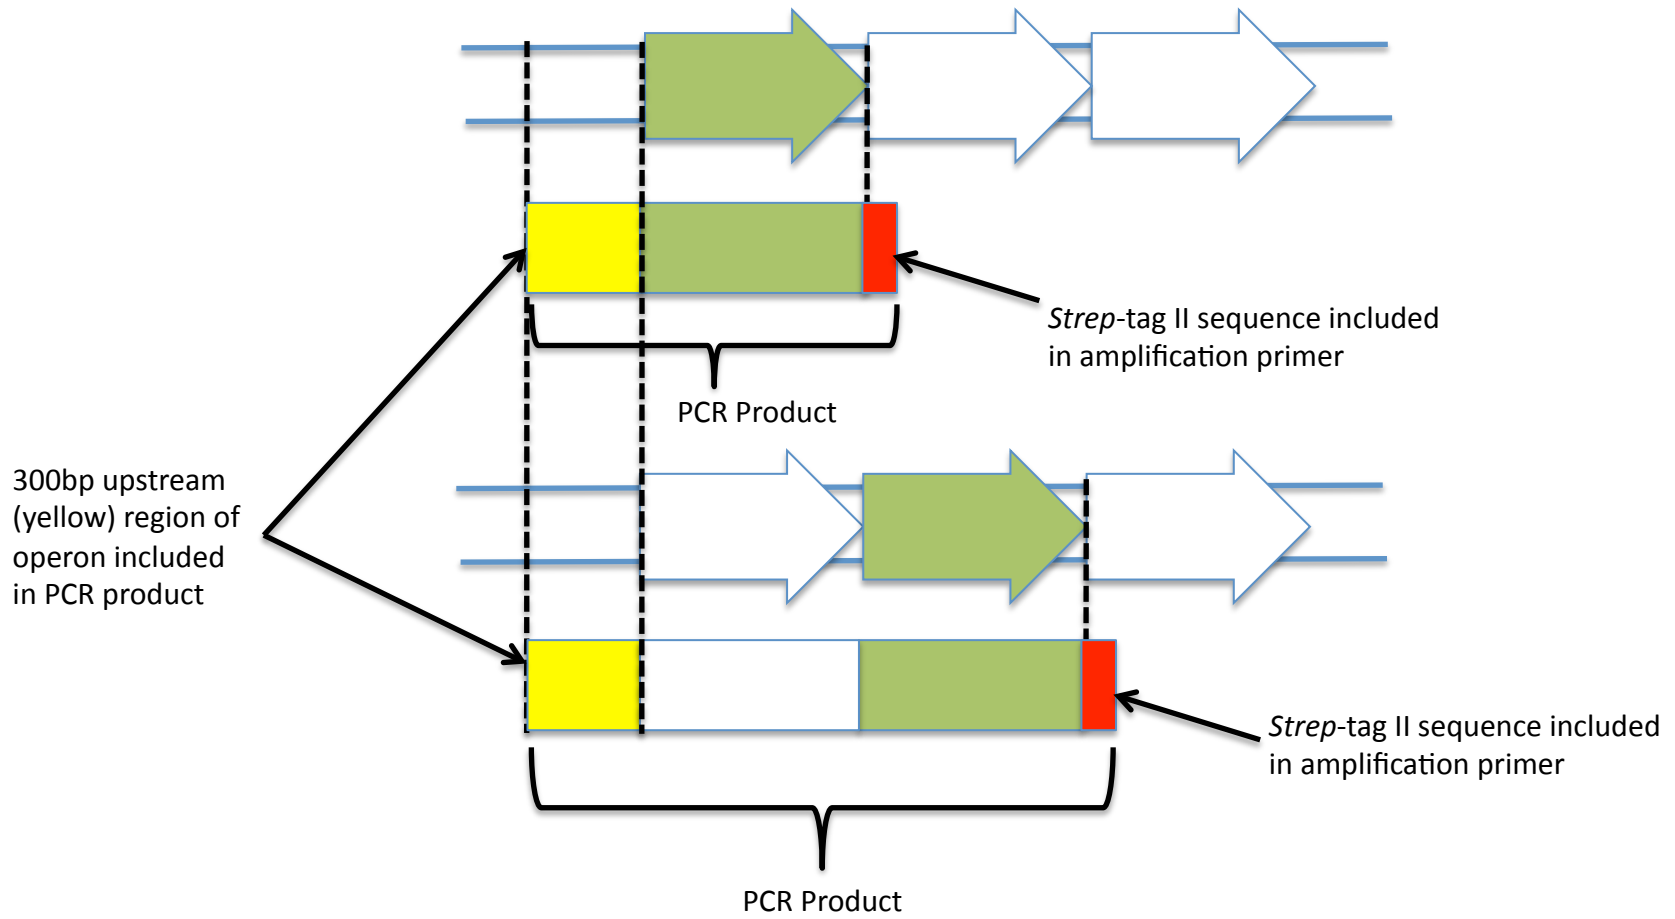

**Scheme III**

Used for *cooH* (DVU2291) and *rub* (DVU3184) (Green):

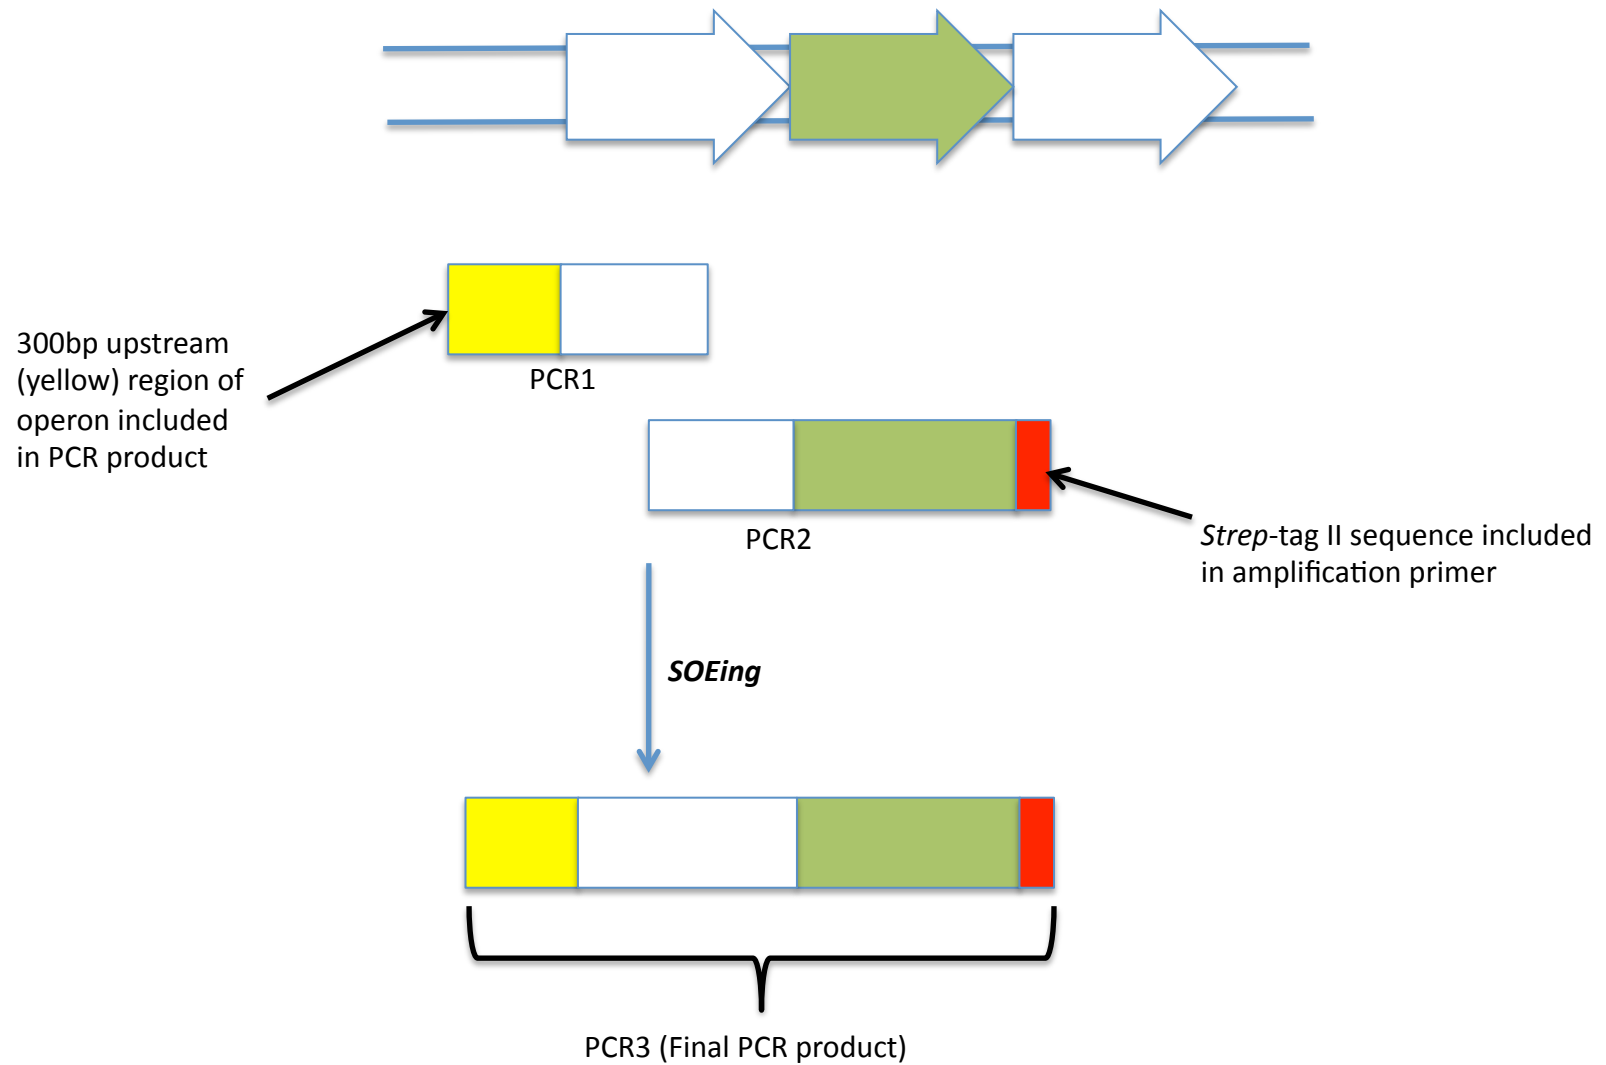

Supplement: pone.0021470.s009.pdf [file pone.0021470.s009.pdf]
